# Supplementary material
Source: PubMed Central journal article supplement (PMC7288636)
Supplement: ONCO-25-481-s001.pdf [file ONCO-25-481-s001.pdf]

Supplemental Tables for:  
 Prediction of benefit from checkpoint inhibitors in mismatch repair deficient metastatic colorectal cancer: role of tumor infiltrating lymphocytes  
 Fotios Loupakis et al.

**Table S1 – Supplementary Materials. Patients' characteristics at diagnosis of metastatic disease**

|                               |                 |                     | RESPONSE*                     |                               |                              | PFS                                              | OS                                              |
|-------------------------------|-----------------|---------------------|-------------------------------|-------------------------------|------------------------------|--------------------------------------------------|-------------------------------------------------|
| Characteristic                |                 | Total = 80<br>N (%) | CR or PR to ICI<br>N = 48 (%) | SD or PD to ICI<br>N = 31 (%) | <i>P</i> -value <sup>§</sup> | HR,<br>(95% CI),<br><i>P</i> -value <sup>§</sup> | HR<br>(95% CI),<br><i>P</i> -value <sup>§</sup> |
| <i>Gender</i>                 | a. Female       | 35 (43.8)           | 23 (47.9)                     | 12 (38.7)                     | 0.491                        | 0.47<br>(0.20-1.14),<br>0.095                    | 0.56<br>(0.21-1.48),<br>0.242                   |
|                               | b. Male         | 45 (56.2)           | 25 (52.1)                     | 19 (61.3)                     |                              |                                                  |                                                 |
| <i>Age</i>                    | Median (range)  | 60 (17-85)          | 60 (22-85)                    | 61 (17-80)                    | -                            | -                                                | -                                               |
| <i>Age (70 years cut-off)</i> | a. >70          | 22 (27.5)           | 14 (29.2)                     | 8 (25.8)                      | 0.802                        | 0.35<br>(0.10-1.17),<br>0.087                    | 0.28<br>(0.06-1.20),<br>0.087                   |
|                               | b. ≤70          | 58 (72.5)           | 34 (70.8)                     | 23 (74.2)                     |                              |                                                  |                                                 |
| <i>Presentation of mets</i>   | a. Synchronous  | 41 (51.3)           | 25 (52.1)                     | 16 (51.6)                     | 1.000                        | 1.50<br>(0.67-3.40),<br>0.328                    | 2.15<br>(0.82-5.68),<br>0.121                   |
|                               | b. Metachronous | 39 (48.7)           | 23 (47.9)                     | 15 (48.4)                     |                              |                                                  |                                                 |
| <i>N° of metastatic sites</i> | a. Multiple     | 31 (38.7)           | 22 (45.8)                     | 9 (29.0)                      | 0.162                        | 0.63                                             | 0.80                                            |

|                               |           |           |           |           |       |                              |                              |
|-------------------------------|-----------|-----------|-----------|-----------|-------|------------------------------|------------------------------|
|                               | b. Single | 49 (61.3) | 26 (54.2) | 22 (71.0) |       | (0.27-1.48),<br><i>0.286</i> | (0.31-2.04),<br><i>0.642</i> |
| <i>Liver involvement</i>      | a. Yes    | 25 (31.3) | 16 (33.3) | 9 (29.0)  | 0.806 | 0.88<br>(0.36-2.13),         | 1.68<br>(0.68-4.18),         |
|                               | b. No     | 55 (68.7) | 32 (66.7) | 22 (71.0) |       | <i>0.777</i><br><i>0.265</i> |                              |
| <i>Lung involvement</i>       | a. Yes    | 7 (8.8)   | 6 (12.5)  | 1 (3.2)   | 0.236 | 0.71<br>(0.16-3.06),         | 1.08<br>(0.25-4.67),         |
|                               | b. No     | 73 (91.2) | 42 (87.5) | 30 (96.8) |       | <i>0.643</i><br><i>0.921</i> |                              |
| <i>Peritoneal involvement</i> | a. Yes    | 30 (37.5) | 14 (29.2) | 15 (48.4) | 0.099 | 1.19<br>(0.53-2.67),         | 0.93<br>(0.37-2.38),         |
|                               | b. No     | 50 (62.5) | 34 (70.8) | 16 (51.6) |       | <i>0.679</i><br><i>0.893</i> |                              |

\* 1 patient not evaluable for response to immune checkpoint inhibition (ICI)

§ All comparisons made for variable a vs b. Fisher's exact test was adopted for Response analyses, Log-rank test for PFS and OS analyses. Significant p-values in bold.

CR=complete response; PR=partial response; SD=stable disease; PD=progression disease

**Table S2 – Supplementary Materials. Immune checkpoint inhibition (ICI) best overall response (BOR)**

| <b>BOR to ICI</b>               | <b>Total = 80<br/>N (%)</b> |                   |
|---------------------------------|-----------------------------|-------------------|
| <i>Complete Response (CR)</i>   | 6 (7.5)                     | ORR* = 48 (60)    |
| <i>Partial Response (PR)</i>    | 42 (52.5)                   |                   |
| <i>Stable Disease (SD)</i>      | 19 (23.8)                   | DCR** = 67 (83.8) |
| <i>Progression Disease (PD)</i> | 12 (15.0)                   |                   |
| <i>Not evaluable</i>            | 1                           |                   |

\* ORR=overall response rate

\*\* DCR=disease control rate

**Table S3 – Supplementary Materials.** Exploratory cohort

| <b>TMB</b>                     |                | <b>Total = 20</b>   |
|--------------------------------|----------------|---------------------|
| All patients                   | Median (range) | 68.6 (11 – 227.9)   |
| <i>Super responder</i> /N=13   | Median (range) | 78.6 (11 – 227.9)   |
| <i>Clearly refractory</i> /N=7 | Median (range) | 50.4 (23.6 – 101.8) |
| <b>TILs</b>                    |                | <b>Total = 20</b>   |
| All patients                   | Median (range) | 4 (0.9 – 9.2)       |
| <i>Super responder</i> /N=13   | Median (range) | 4 (0.9 – 9.2)       |
| <i>Clearly refractory</i> /N=7 | Median (range) | 2.1 (0.9 – 7.6)     |

**Table S4 – Supplementary Materials.** TILs density in the whole cohort

| TILs density        |                | Total = 80       |
|---------------------|----------------|------------------|
| High ( $\geq 2$ )   | N (%)          | 52 (65.0)        |
| Low ( $< 2$ )       | N (%)          | 28 (35.0)        |
| All patients        | Median (range) | 3.0 (0.2 – 47.4) |
| Responder/N=48*     | Median (range) | 3.6 (0.2 – 47.4) |
| Not responder/N=31* | Median (range) | 1.8 (0.4 – 8.6)  |

\* 1 patient not evaluable for response
